# Supplementary material
Source: Copernicus journal article supplement (doi:10.5194/egusphere-2026-635)
Supplement: Supplementary file [file egusphere-2026-635-AC1-supplement.pdf]

## Response to reviewer comments for “Root turnover and soil indicators capture belowground recovery following saltmarsh restoration”

Sabrina K.B. Olsson<sup>1,2\*</sup>, Anirban Akhand<sup>1,2</sup>, Peter I. Macreadie<sup>1,2</sup>, Joeri Kaal<sup>3</sup>, Siegmund Nuyts<sup>2</sup>, Paul E. Carnell<sup>1,2</sup>, Stacey M. Trevathan-Tackett<sup>1,2\*</sup>

<sup>1</sup>Centre for Nature Positive Solutions, Biology Discipline, School of Science, RMIT University, Victoria, Australia

<sup>2</sup>School of Life and Environmental Science, Deakin Marine Research and Innovation Centre, Deakin University, Victoria, Australia

<sup>3</sup>Pyrolyscience, Santiago de Compostela, Spain

*Correspondence to:* Sabrina K. B. Olsson ([sabrina.olsson@rmit.edu.au](mailto:sabrina.olsson@rmit.edu.au)) and Stacey M. Trevathan-Tackett ([stacey-trevathan-tackett@rmit.edu.au](mailto:stacey-trevathan-tackett@rmit.edu.au))

### **General comments**

The study by Olsson et al. uses a space-for-time approach to evaluate the impact of restoration, through ungulate exclusion, on soil properties and carbon sequestration in saltmarsh ecosystems. The authors show that soils in areas subjected to exclusion fencing resemble natural reference conditions after 25 years, suggesting that this is an effective measure for improving physical, chemical, and biological soil properties. While studies assessing restoration outcomes in saltmarsh ecosystems often focus on only a limited number of indicators of belowground ecological function, this study examines a wide range of soil quality metrics. In particular, the authors highlight soil strength as a potentially useful indicator of belowground recovery. Restored and natural reference sites exhibited greater preservation of surficial recalcitrant carbon stocks, whereas enhanced microbial turnover likely occurred in disturbed soils in grazed saltmarshes. Overall, the study demonstrates the potential of exclusion fencing as a restoration strategy to enhance organic carbon stabilization in saltmarsh ecosystems.

The manuscript is clearly written and will likely be of interest to researchers and stakeholders working on saltmarsh restoration, as well as to a broader audience concerned with blue carbon sequestration.

Response: Thank you for this feedback. We have improved our manuscript based on your suggestions, particularly the motivation for testing the top 10 cm of soil and the condition under which the use of exclusion fencing is most relevant. Line numbers are included for new or edited text from the tracked changes version.

### Specific comments

1. The authors could better justify why only the top 10 cm of the soil profile was sampled and analyzed, given that greater depths are typically included in standard blue carbon stock assessments, as noted in the manuscript. Expanding the discussion on how well surface soil patterns reflect deeper soil conditions and total carbon stocks would strengthen the interpretation of the results and provide useful context for readers.

Response: We have included the following paragraph in the discussion and included a relevant reference, supporting this statement.

L577-581: "Analyses of saltmarsh and mudflat sediments indicate that organic matter degradation is largely confined to the upper 5-10 cm, showing minimal change below this depth (Benjamin et al. 2026). Therefore, we focused on the top 10 cm in this study to quantifying the organic matter cycling.

Benjamin, A., Benedicte, D., Chaumillon, E., Rumpel, C., Dignac, M. F., Felbacq, A., Schmidt, S., Destampes, M., Arnaud, M., Metzger, E., Lacoue-Labarthe, T., & Dupuy, C. (2026). Organic carbon composition and preservation in macrotidal coastal wetland sediment: insights from biomarkers and isotopic signatures. *Sci Total Environ*, 1020, 181542. <https://doi.org/10.1016/j.scitotenv.2026.181542>

2. There is a general lack of consistency between figure/table references and the corresponding content. Please ensure that all references correctly match the figures and tables cited.

Examples of mismatches include:

Line 258: A reference to Table S2 and Table S3 but the text does not match with the information in these tables.

Figure S4 is mentioned before S3.

Line 330 and 333: Table S4 should be Table S2.

Line 364 and 377: Table S5 should be Table S3.

Line 386 and 391: Figure 7 should be Figure 6.

Response: We apologise for this inconvenience; an old version of the supplementary material had been uploaded by mistake. Figure S4 and S3 have been reordered. The tables and figures listed in the manuscript now match the table and figure labels in the supplementary material.

3. The authors state that ungulate exclusion through fencing is an attractive restoration approach due to its low cost and minimal intervention, and that large-scale wetland restoration is increasingly needed. However, these landscapes are also used for livestock grazing. The authors could potentially strengthen the discussion by briefly addressing under which conditions exclusion fencing is most appropriate or efficient.

Response: This sentence has been added:

L60-63: "Exclusion fencing as a coastal wetland restoration method is especially relevant in an Australia context, as there is a disproportionate impact of introduced ungulates on marginal lands (Rowland and Lovelock, 2024)"

### **Technical corrections**

Line 53 – 54: The sentence starting with "There is an increasing..." appears out of context and disrupts the flow. Consider rephrasing. Also, motivate why there is an increasing demand for large-scale wetland restoration.

Response: Done. The sentence and motivation have been included earlier in the paragraph. The sentence now reads:

L48-51 "Such coastal wetland degradation can compromise key ecosystem functions, including food chain supply, biodiversity conservation, resilience to sea level rise, water filtration, and carbon accumulation and storage (Prahald, 2014). Therefore, there is an increasing demand for large-scale wetland restoration and protection (Macreadie et al., 2021)."

Line 487: Remove "the" after "preservation".

Response: Done

Line 526 – 529: This sentence is difficult to follow and should be simplified for clarity.

Response: Done. The sentence now reads:

L542-545: “Disturbing coastal soils releases reactive organic matter. This changes the microbial community and causes microbes to start breaking down complex organic compounds that normally stay stable, which in turn releases CO<sub>2</sub> emissions (Ward et al., 2019; Macreadie et al., 2025).” Line 525: Please clarify the mechanism by which low nutrient availability would stimulate root turnover.

Response: The use of “low nutrients” here was misleading as we are discussing organic matter as a whole and not just inorganic nutrients. The sentence has been changed:

L536-539: “In contrast, the highly compacted, historically grazed soils in this study have higher saltmarsh root turnover, potentially due to a combination of low availability of organic matter, less frequent inundation and higher temperatures (Figure 8).”

Figure 7: Variable names overlap in the figure, which reduces readability.

Response: Figure has been adjusted. The update version is here:

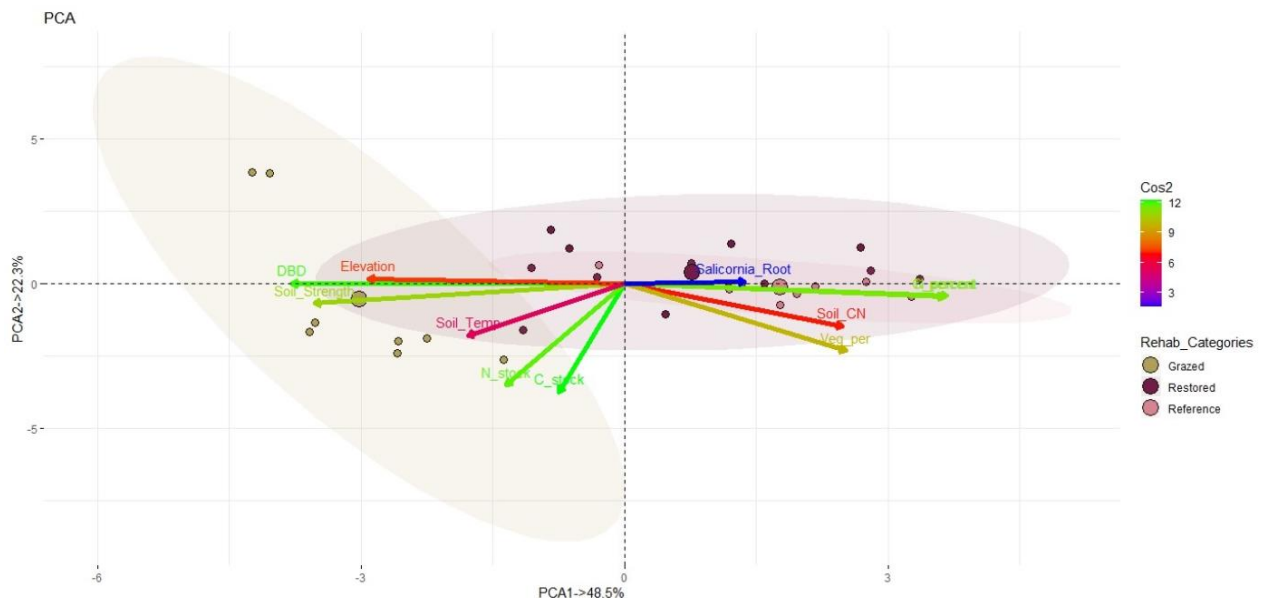

Figure 8: It is not clearly visible in the figure that root decomposition is lower in the restored and natural reference sites. This could potentially be made clearer. Additionally,

the figure appears to suggest higher aboveground biodiversity in the natural reference site, which differs from the description in the text.

Response: Figure has been adjusted. See update version here:

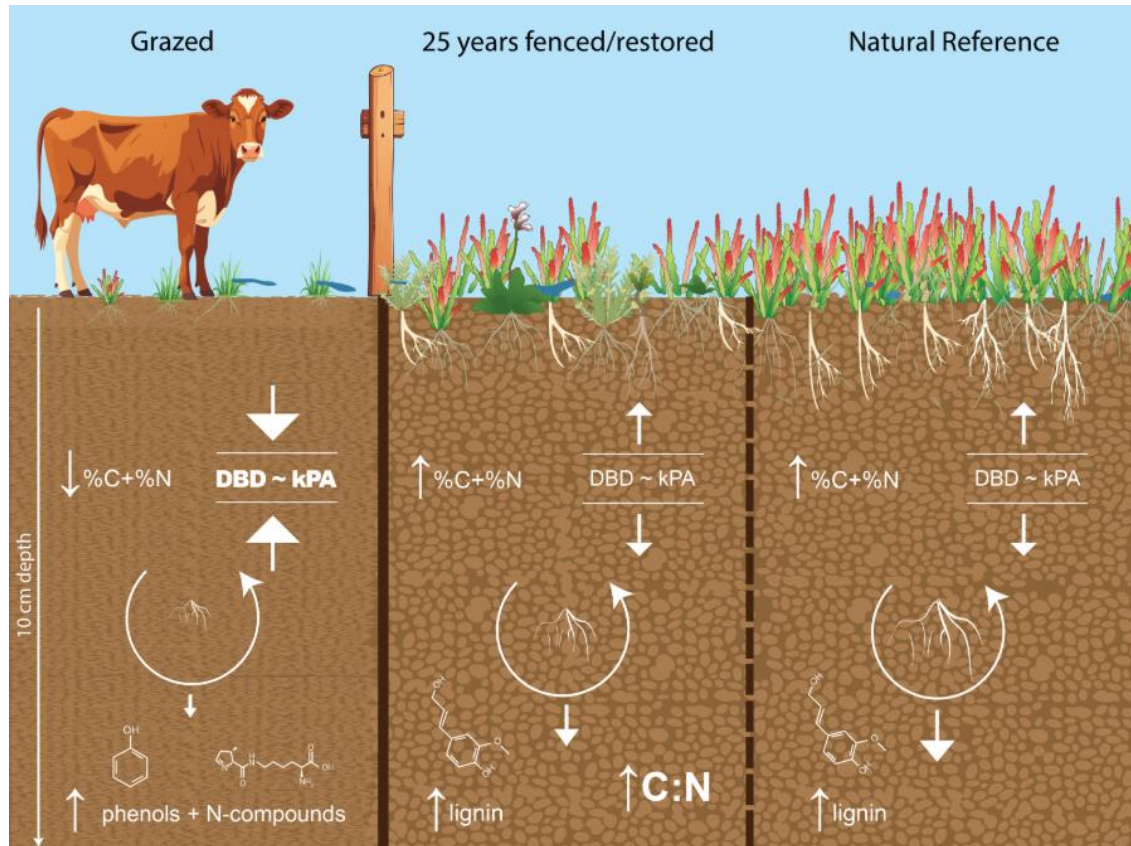

Supplementary Materials: The title does not match with the title of the manuscript and should be corrected.

Response: This has been corrected.
